# Supplementary material for: In Vivo Robustness Analysis of Cell Division Cycle Genes in Saccharomyces cerevisiae
Source: PLOS journal article supplement (doi:10.1371/journal.pgen.0020111), 2006-07-10
Supplement: S2 (10.1371/journal.pgen.0020111.s002) [file journal.pgen.0020111.s002]

% RENAME THIS FILE 'partest_moriya_special.m'

% script partest_script
% Set default initial condition.
cell03_setup
params;
ksn2 = [2, 1; 2, 2];
wt_report=cell03_partest_moriya_sp(init,p_names,ksn2)
 
